# Supplementary material for: Second order hyperpolarizability of triphenylamine based organic sensitizers: a first principle theoretical study
Source: Royal Society of Chemistry journal article supplement (doi:10.1039/c6ra11200e), 2016-01-01
Supplement: c6ra11200e1.pdf [file c6ra11200e1.pdf]

# SECOND ORDER HYPERPOLARIZABILITY OF TRIPHENYLAMINE BASED ORGANIC SENSITIZERS: A FIRST PRINCIPLE THEORETICAL STUDY

M. Prakasam<sup>a,b</sup> and P. M. Anbarasan<sup>a,b</sup>\*

<sup>a</sup>Department of Physics, Periyar University, Salem - 636 011, Tamil Nadu, India.

<sup>b</sup>Centre for Nanoscience and Nanotechnology, Periyar University, Salem - 636 011, Tamil Nadu, India

## Supporting Information

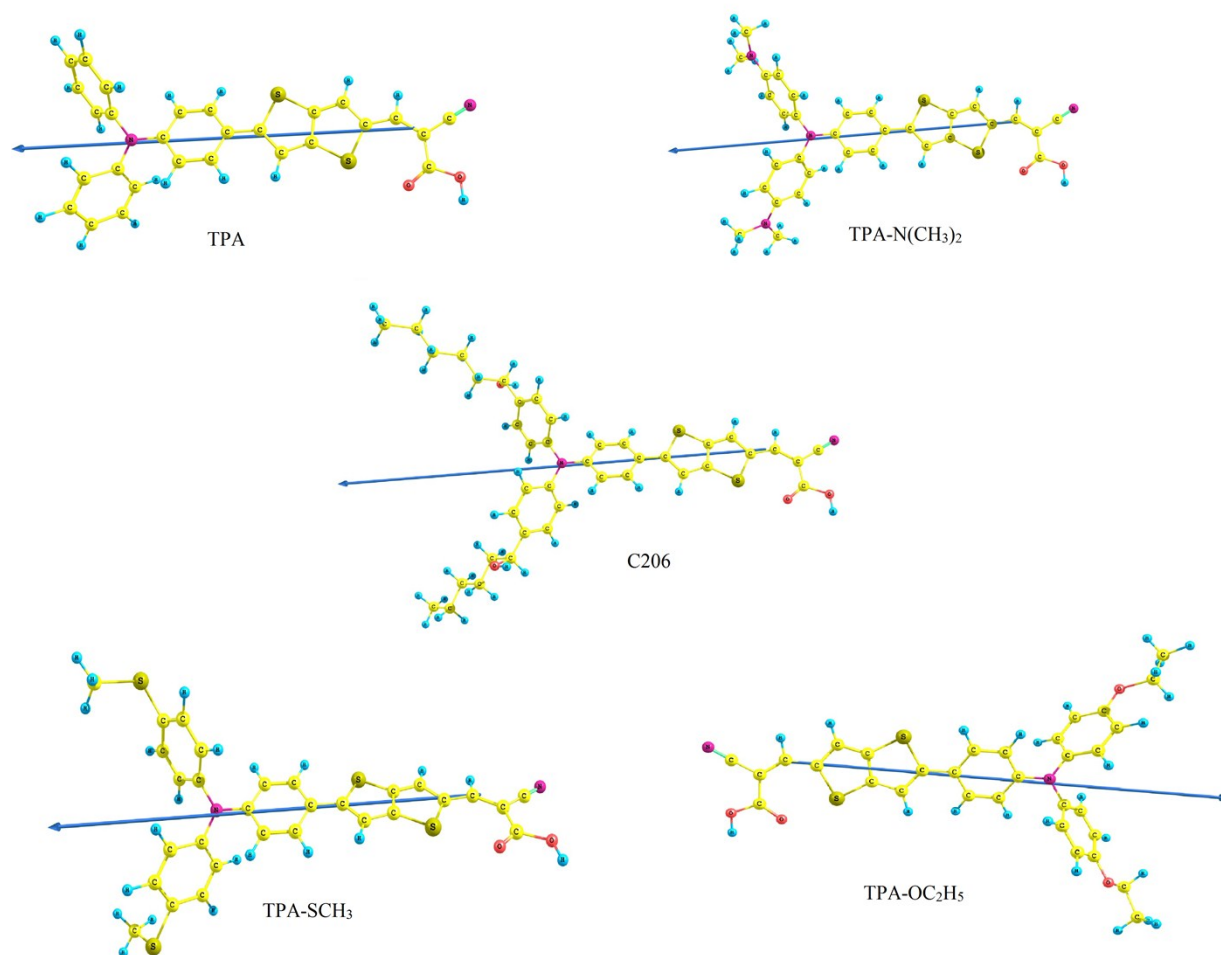

Fig. S1 Dipole moment of the designed molecules

Table S1: Computed excitation energies, electronic transition configurations and oscillator Strengths (f) for the optical transitions of the absorption bands in visible and near-UV region for the dyes in chloroform

| Dye                                  | Energy (cm <sup>-1</sup> ) | Wavelength (nm) | Oscillator strength (f) | Major Transition                  |
|--------------------------------------|----------------------------|-----------------|-------------------------|-----------------------------------|
| C206                                 | 19679.26                   | 508             | 0.6834                  | HOMO->LUMO (99%)                  |
|                                      | 25813.95                   | 387             | 0.6391                  | H-1->LUMO (95%)                   |
|                                      | 28331.23                   | 352             | 0.1873                  | H-3->LUMO (55%), H-2->LUMO (38%)  |
| TPA                                  | 21342.38                   | 468             | 1.3948                  | HOMO->LUMO (98%)                  |
|                                      | 22461.89                   | 445             | 0.0008                  | H-2->LUMO (96%)                   |
|                                      | 27450.46                   | 364             | 0.0734                  | H-3->LUMO (69%), H-1->LUMO (-29%) |
| TPA-N(CH <sub>3</sub> ) <sub>2</sub> | 17340.23                   | 576             | 0.8052                  | HOMO->LUMO (100%)                 |
|                                      | 23126.49                   | 432             | 0.0003                  | H-3->LUMO (96%)                   |
|                                      | 23816.91                   | 419             | 0.0151                  | H-1->LUMO (100%)                  |
| TPA-SCH <sub>3</sub>                 | 21265.76                   | 470             | 0.8095                  | HOMO->LUMO (98%)                  |
|                                      | 21656.14                   | 461             | 0.0009                  | H-1->LUMO (100%)                  |
|                                      | 21831.16                   | 458             | 0.3915                  | H-2->LUMO (98%)                   |
| TPA-OC <sub>2</sub> H <sub>5</sub>   | 19186.45                   | 521             | 0.9716                  | HOMO->LUMO (99%)                  |
|                                      | 23133.75                   | 432             | 0.0003                  | H-3->LUMO (96%)                   |
|                                      | 26784.24                   | 373             | 0.979                   | H-1->LUMO (93%)                   |
